# Supplementary material for: The skull variation of the olive field mouse Abrothrix olivacea (Cricetidae: Abrotrichini) is localized and correlated to the ecogeographic features of its geographic distribution
Source: PeerJ. 2023 Apr 14;11:e15200. doi: 10.7717/peerj.15200 (PMC10108858; doi:10.7717/peerj.15200)
Supplement: Supplemental Information 1 [file peerj-11-15200-s001.xlsx]

## Sheet: Skull
case	id_specimen	SL	CIL	ZB	BB	ParL	IL	IW	DL	TL	PW.M1	PW.M3	ZPW	NL	NW	RW	FSW	IB	FL	PalL	WMF
1	CMI_FBM470	25.74	23.18	12.62	11.79	10.49	5.89	1.63	6.59	3.5	5.02	3.61	1.84	10.12	3.09	4.47	6.19	4.03	8.63	5.89	1.09
2	CMI_FBM505	26.08	23.73	13.44	11.88	10.79	6.49	1.9	6.98	3.79	5.23	4.21	2.04	10.93	3.69	4.88	6.39	4.38	7.64	5.91	1.36
3	CMI181	25.88	23.02	12.63	11.93	10.59	5.38	1.67	6.48	3.47	5.14	4.31	2.18	11.07	3.68	4.97	6.5	4.31	7.51	5.99	1.29
4	CMI182	26.28	23.41	13.33	11.79	10.7	5.8	1.82	7.11	3.42	4.92	3.84	1.79	10.7	3.49	4.31	6.04	4.38	8.81	6.27	1.23
5	CMI2153	26	23.32	12.78	11.69	10.02	6.13	1.89	6.61	3.7	5.11	3.81	2.19	10.23	3.4	4.78	6.19	4.07	6.89	5.99	1.09
6	CMI2166	25.8	23.1	12.8	11.6	10	5.8	1.7	6.3	3.7	5.2	4	2.1	10.2	3.4	5	6.4	4.1	7.4	5.6	1.1
7	CMI2167	26	23	12.7	11.7	10.4	5.8	1.7	6.5	3.6	4.9	4	2.1	10.2	3.3	4.8	6	4.1	7.6	5.9	1.1
8	CMI2188	24.3	21.2	12	11.6	9	5.2	1.6	5.7	3.7	5	4	1.9	10	3.3	4.6	6	4.1	7	5.9	1
9	CMI4926	24.4	21.8	12.2	12	9.5	5.4	1.7	5.9	3.7	5.1	4	2	9.6	3.2	4.6	6	4.2	7	6.1	1
10	CMI4940	25.4	22.3	12.2	11.3	10	5.6	1.8	6.1	3.7	5.1	3.9	2.2	10.4	3.4	4.7	6	4	7.5	5.4	1
11	CMI4953	25.1	22.3	12.7	11.7	10.1	5.4	1.5	6.2	3.7	5.1	4.2	2	10.2	3.4	4.9	6.1	4.2	7.3	5.5	1
12	CMI7049	24.13	21.92	12.49	11.49	9.56	4.88	1.52	4.87	3.69	4.94	3.88	2.1	8.9	3.44	4.4	5.82	4.19	8.21	5.79	1.07
13	CMI7051	25.08	22.41	12.51	11.62	9.71	5.01	1.67	5.88	3.84	4.88	3.67	2.08	9.8	3.51	4.78	6.01	4.08	7.98	5.57	1.04
14	CMI7060	23.81	21.04	11.97	11.25	8.78	4.57	1.61	5.38	3.72	4.99	3.79	1.81	8.67	3.39	4.33	5.62	4.17	8.18	5.7	1.19
15	CMI7345	23.49	21.09	12.28	11.38	9.01	4.74	1.51	5.62	3.48	4.96	3.73	2.04	9.08	3.11	4.24	5.94	4.19	7.09	5.02	0.92
16	CNP1136	24.23	21.84	12.27	11.4	9.22	5.51	1.48	5.93	3.29	4.81	4.17	2.08	9.26	3.43	4.58	5.73	4.12	8.17	5.18	1.05
17	CNP1149	24.17	21.35	12.42	11.92	9.26	5.64	1.86	5.99	3.49	4.69	4.15	2.06	9.17	3.64	4.56	6.03	4.26	7.58	5.5	1.09
18	CNP1268	23.38	20.99	12.18	11.23	8.96	5.09	1.41	5.43	3.32	4.58	4.11	2.12	9.32	3.45	4.7	5.67	3.88	7.43	5.68	1.12
19	CNP1284	23.4	20.49	11.61	11.26	8.96	4.98	1.5	5.65	3.21	4.44	4.01	1.86	9.79	2.85	4.06	5.6	3.98	7.34	5.68	1.07
20	CNP2156	25.12	22.39	12.31	11.52	9.46	5.85	1.59	6.17	3.49	4.7	3.78	2.1	9.84	3.5	4.4	6.07	4.01	7.71	5.87	1.04
21	CNP2157	25.58	22.68	12.7	11.78	9.68	5.49	1.97	6.25	3.46	5.05	4.25	2.07	9.92	3.24	4.39	6.09	4.14	7.79	6.3	1.17
22	CNP2163	25.42	22.56	12.38	11.49	10.12	5.71	1.73	6.45	3.5	4.79	4.44	2.05	10.2	3.56	4.44	6.12	4.05	7.45	6	0.85
23	CNP2210	25.26	22.62	12.66	11.57	9.67	5.49	1.68	5.71	4.07	5.1	4.17	2.12	9.67	3.47	5.21	6.16	4.16	7.62	5.68	0.79
24	CNP2254	24.16	21.42	12.09	11.26	9.35	5.32	1.65	5.76	3.6	4.51	3.97	1.91	8.94	3.29	4.62	6.02	4.14	7.66	5.48	0.8
25	CNP2265	25.12	22.98	12.91	11.44	9.72	5.79	1.78	5.79	3.59	4.98	4.1	2.04	9.62	3.56	4.92	5.91	3.96	7.12	5.27	0.64
26	CNP2534	26.44	23.86	13.57	11.78	10.53	5.94	1.99	6.84	3.52	5.15	4.39	2.16	11.09	3.87	4.84	6.03	4.15	8.11	5.97	1.23
27	CNP2535	25.4	22.85	12.88	11.27	10.2	6.02	1.68	6.58	3.45	4.99	4.18	2.18	10.15	3.28	4.43	5.54	4.21	7.65	6.16	1.08
28	CNP2541	23.61	20.64	11.71	11.21	8.79	5.22	1.43	5.57	3.64	4.63	4.16	2.18	9.12	3.44	4.38	5.58	4.23	7.52	5.23	1.19
29	CNP2543	23.89	21.23	12.25	11.41	9.25	5.28	1.71	5.99	3.46	4.92	3.86	2.06	9.4	3.54	4.35	6.06	4.07	7.9	5.9	1.11
30	CNP2550	25.07	21.99	12	11.05	9.6	5.34	1.73	6.06	3.74	4.67	3.87	2.11	10.04	3.4	4.61	5.82	3.99	7.88	5.81	0.98
31	CNP2551	24.45	21.73	12.03	11.33	9.89	5.38	1.73	6.08	3.45	4.78	3.97	2.03	9.61	3.28	4.59	5.68	4.25	7.7	5.41	1.16
32	CNP2552	23.35	21	11.92	11.36	9.1	4.9	1.55	5.79	3.2	4.66	4.01	2.41	9.87	3.68	4.53	5.69	3.99	7.29	6.03	1.31
33	CNP2557	23.07	20.37	11.78	11.32	8.87	5.11	1.59	5.72	3.55	4.52	4.4	1.78	8.75	3.46	4.24	5.5	4.17	7.64	6.11	1.08
34	CNP2560	24.2	21.38	12.03	11.57	9.49	5.31	1.6	5.98	3.39	4.65	4.21	1.93	9.31	3.24	4.55	5.75	4.1	7.84	5.74	1.27
35	CNP2563	25.05	22.14	12.47	11.47	9.63	5.4	1.8	6.18	3.62	4.83	4.31	2.01	10.21	3.16	4.69	5.88	4.17	6.89	5.92	1.1
36	CNP2565	26.21	23.79	13.04	11.94	10.25	5.91	1.92	6.8	3.6	4.95	4.21	2.06	10.37	3.55	4.74	5.95	4.18	7.5	6.18	1.17
37	CNP2596	25.21	22.29	12.59	11.52	9.63	5.73	1.82	6.33	3.65	4.77	4.4	2.04	10.22	3.41	4.58	5.72	4.18	7.69	5.99	1.27
38	CNP2598	24.67	22.07	12.52	11.13	9.64	5.57	1.68	6.19	3.54	4.78	4.28	2.05	10.06	3.58	4.37	5.82	4.15	7.63	5.89	0.9
39	CNP2602	24.73	21.28	12.18	11.31	9.68	5.7	1.71	6.05	3.68	4.86	4.28	1.87	9.66	3.31	4.43	5.57	4.19	7.86	5.86	1.18
40	CNP2608	23.86	21.09	12.47	11.59	9.25	5.55	1.68	6.04	3.58	4.78	4.23	1.95	8.82	3.48	4.52	5.56	4.14	8.49	6.03	1.06
41	CNP2618	23.39	20.53	11.82	11.08	9.05	5.11	1.57	5.58	3.54	4.68	4.31	1.82	8.92	3.44	4.42	5.4	4.1	7.36	5.97	1.33
42	CNP2620	24.83	21.89	12.79	11.73	9.7	5.71	1.77	6.06	3.74	4.76	4.21	1.97	10.24	3.6	4.62	5.73	4.31	7.93	4.96	1.02
43	CNP2632	25.1	22.43	12.34	11.31	9.87	5.62	1.75	6.24	3.68	4.97	4.32	2.01	10.24	3.15	4.57	5.71	4.18	7.85	6.33	1.14
44	CNP2654	24.84	21.78	12.33	11.62	9.45	5.34	1.75	5.98	3.71	4.89	4.35	1.95	10.29	3.31	4.77	6	4.13	7.21	5.96	1.06
45	CNP2655	24.3	21.39	12.04	11.55	9.36	5.45	1.62	6.03	3.52	4.61	4.18	1.94	9.7	3.23	4.6	5.44	4.14	7.36	6.03	1.06
46	CNP2664	25.32	22.41	12.66	11.36	9.45	5.32	1.61	5.99	3.59	4.96	4.33	2.05	10.11	3.29	4.66	5.85	4.19	8.07	5.44	1.02
47	CNP2671	25.84	22.77	12.99	11.55	9.87	5.59	1.53	6.14	3.51	4.95	4.36	2.06	10.68	3.33	4.61	5.81	4.05	7.88	6.09	1.19
48	CNP2683	24.79	21.78	12.41	11.47	9.5	5.57	1.8	5.94	3.68	4.69	4.1	1.89	9.38	3.6	4.56	5.67	4.19	7.81	5.98	1.13
49	CNP2901	23.75	21.18	12.15	11.31	9.29	5.06	1.61	5.9	3.53	4.84	4.21	1.93	9.56	3.14	4.5	5.67	4.07	7.85	5.56	1.32
50	CNP2902	24.14	21.61	11.97	11.36	9.2	5.18	1.58	5.64	3.73	4.73	3.82	1.91	9.8	3.52	4.51	6.12	4.17	7.28	5.29	1.05
51	CNP2907	24.45	21.68	12.45	11.36	9.14	5.16	1.6	6.1	3.39	4.7	3.92	1.98	9.84	3.4	4.63	5.4	4.01	7.99	5.77	1.02
52	CNP2932	24.71	21.59	12.33	11.38	9.45	5.68	1.84	6.09	3.4	4.85	4.36	1.97	9.92	3.35	4.56	5.86	4.28	7.21	6.47	1.13
53	CNP331	23.98	21.3	11.95	10.79	8.98	5.15	1.68	5.65	3.13	4.84	3.78	2.07	9.46	3.2	4.6	5.69	3.91	7.35	5.11	1.3
54	CNP409	24.05	21.57	11.95	11.05	9.44	5.36	1.58	5.93	3.37	4.55	4.03	2.01	9.61	3.36	4.32	5.66	3.88	7.33	5.42	1.26
55	CNP4335	24.43	21.94	12.35	11.29	9.56	5.43	1.81	5.86	3.9	4.83	4.09	2.08	9.79	3.64	4.76	5.9	4.07	7.52	5.24	1.3
56	CNP4337	23.6	20.86	12.2	11.58	8.99	4.81	1.48	5.53	3.8	4.54	4.04	1.86	9.18	3.5	4.35	5.71	4.11	7.73	5.61	1.02
57	CNP4479	24.33	21.53	11.87	11.36	9.43	5.5	1.91	5.9	3.54	4.97	4.4	2.01	9.4	3.21	4.17	5.47	4.08	8.06	5.77	1.21
58	CNP4485	23.42	20.82	12.31	11.27	9.06	5.26	1.64	5.56	3.56	4.8	4	2.01	9.64	3.09	4.37	5.61	4.28	7.19	5.02	1.15
59	CNP4488	23.15	20.63	12.12	11.79	9.2	4.79	1.56	5.7	3.44	4.47	3.9	2.01	9.51	3.1	4.41	5.56	4.13	7.6	5.89	0.97
60	CNP4505	24.59	21.86	12.67	11.16	9.4	5.66	1.7	5.84	3.49	4.93	4.47	2.11	9.61	3.51	4.51	5.52	4	7.49	5.52	1.19
61	CNP4544	23.16	20.52	11.59	11.14	9.28	5.17	1.65	5.68	3.37	4.45	3.81	1.91	9.12	3.16	4.1	5.41	3.91	7.19	5.73	1.09
62	CNP4549	24.7	22.27	12.89	11.71	9.54	5.5	1.67	6.09	3.84	5.01	4.33	2.16	9.57	3.41	4.49	6	4.17	7.71	6.48	1.12
63	CNP4559	23.28	20.64	11.79	11.14	9.1	5.48	1.62	5.68	3.48	4.66	4.16	1.98	9.42	3.27	4.04	5.47	4.02	7.1	5.59	1.06
64	CNP813	25.33	22.9	12.96	11.71	10.06	5.65	1.7	6.73	3.42	5	4.47	2.16	10.04	3.77	4.69	6.19	4.35	7.68	5.01	1.58
65	CNP863	24.94	22.43	12.93	11.43	9.7	5.51	1.78	6.18	3.51	5.06	4.26	2.2	10.09	3.64	4.91	6.25	4.14	7.64	5.92	1.24
66	CNP932	23.56	20.77	11.85	11.28	8.75	4.57	1.5	5.62	3.26	4.63	4.18	1.89	9.3	3.35	4.39	5.51	4.11	7.32	5.41	0.92
67	FMNH124544	26.63	24.11	12.88	11.55	10.69	6.3	2.01	6.67	3.83	5.3	4.33	2.38	11.02	3.22	4.87	6.09	4.4	7.17	6.47	1.56
68	FMNH23005	25.27	23.02	12.32	11.29	10.2	5.81	1.61	6.43	3.88	4.89	4.02	2.22	9.19	3.18	4.56	5.49	4.23	8.14	5.51	1.18
69	FMNH23006	25.36	23.35	12.69	11.94	10.62	5.9	1.84	6.56	3.81	5.3	4.45	2.33	8.98	2.97	4.75	5.87	4.33	8.4	5.6	1.25
70	FMNH23007	27.14	24.69	13.01	11.47	11.03	6.07	1.62	6.5	3.79	4.95	3.99	2.54	10.09	3.5	4.89	5.93	4.21	8.17	5.72	1.05
71	FMNH23008	24.59	22.56	12.4	11.23	9.79	5.63	1.85	6.09	3.66	4.99	4.31	2.34	8.71	3.06	4.46	5.36	4.11	8.19	5.85	1.39
72	FMNH23009	25.21	23.41	12.44	11.45	10.63	6.15	1.76	6.04	3.83	4.93	4.08	2.19	8.7	3.13	4.79	5.66	4.28	7.64	6.02	1.3
73	MACN27824	24.56	22.26	12.36	11.36	9.73	5.51	1.68	6.29	3.24	4.7	4.32	1.89	10.15	2.84	4.3	5.52	4.22	6.96	5.69	1.13
74	MACN27827	24.41	21.9	12.21	11.18	9.56	5.58	1.77	5.95	3.54	4.88	3.86	1.81	9.77	2.94	4.54	5.56	3.95	6.45	5.03	1.39
75	MACN27841	25.29	22.8	12.69	11.47	9.69	5.99	1.76	6.17	3.61	4.85	4.27	2.04	10.15	3.27	4.26	5.78	4	6.84	5.64	1.12
76	MACN27844	25.4	22.61	12.86	11.48	9.79	5.4	1.74	6.24	3.66	4.88	4.05	1.76	9.54	3.23	4.51	5.8	4.16	7.53	5.69	1.13
77	MACN27845	25.05	22.46	12.61	11.45	9.95	5.65	1.66	6.22	3.6	4.76	4.06	1.86	10.03	2.72	4.25	5.64	4.13	8.03	5.52	1.16
78	MACN27848	25.21	22.65	12.78	11.66	9.84	5.71	1.71	6.24	3.62	4.78	4.13	1.9	10.1	3.19	4.33	5.62	4.11	7.21	6.05	1.18
79	MACN27850	22.73	19.96	11.88	11.3	8.8	4.84	1.77	5.29	3.49	4.61	3.96	1.76	8.86	3.17	4.26	5.29	4.11	6.95	5.38	0.97
80	MACN27851	24.55	21.98	12.04	11.3	9.72	4.91	1.56	5.93	3.6	4.71	3.78	1.93	9.74	2.45	4.06	5.25	3.99	6.36	5.25	1.09
81	MACN27853	24.62	21.87	12.12	11.09	9.42	4.7	1.72	5.96	3.57	4.99	3.96	1.72	10.26	3.09	4.47	5.47	3.98	6.81	5.17	1.26
82	MACN27854	25.04	22.5	12.61	11.49	10.02	5.42	1.61	6.39	3.46	4.73	4.18	1.77	10.22	2.84	4.42	5.77	4.11	7.08	5.31	1.48
83	MACN27855	24.36	21.54	12.04	11.13	9.47	5.21	1.57	5.94	3.28	4.68	3.85	1.65	9.29	2.7	4.51	5.47	3.86	7.63	5.22	1.16
84	MASTO312	26.44	23.65	12.7	11.6	10.55	5.97	2.01	7.01	3.44	4.97	4.18	2.19	10.83	3.15	4.29	5.36	4.05	7.64	6.98	1.45
85	MLP8-10-2-13	26.2	23.2	13	11.7	10.3	5.9	2.1	6.5	3.9	5	4.2	2.2	9.9	3.5	5.2	6.2	4.3	7.4	5.9	1.2
86	MLP8-10-2-14	25.7	23	13.2	12	10.3	5.8	2.1	6.3	4	5.2	4.2	2.3	9.5	3.4	5.2	6.3	4	7.2	5.9	1.1
87	MLP8-10-2-15	25.5	22.8	13.5	11.9	10.1	5.6	1.9	6.5	3.8	5	4.1	2.2	10.2	3.4	5.2	6.4	4.3	7.7	5.9	1
88	NHNM482127	26.58	23.91	12.59	11.37	10.52	6.04	2	6.59	3.7	5.13	4.14	2.02	10.75	3.09	4.42	5.94	4.34	8.22	5.8	1.5
89	NHNM482128	25.12	22.02	12.35	11.59	9.53	5.64	1.7	6.13	3.55	5.02	4.38	2	9.91	2.75	4	5.87	4.31	7.79	5.75	1.4
90	NHNM482129	25.92	23.4	12.38	11.73	10.09	5.75	1.72	6.49	3.74	4.92	4.52	2.17	10.49	2.98	4.52	6.13	4.46	8.39	6.31	1.73
91	NHNM482144	25.5	22.77	11.9	11.66	10.15	5.75	1.7	6.27	3.69	4.7	4	1.91	10.62	2.94	4.44	5.87	4.35	7.14	5.7	1.47
92	NHNM501220	27.23	24.26	13.63	12.3	11.35	6.38	1.88	7.04	4.1	5.25	4.53	2.06	11.31	3.5	4.67	6.17	4.59	8.19	6.85	1.54
93	NHNM501221	26.59	23.73	13.63	12.4	11.07	6.34	2.12	6.85	4.01	5.28	4.36	2.22	10.12	3.29	4.61	6.4	4.58	7.63	6.47	1.61
94	UACH1000	24.67	23.71	13.5	11.5	10.25	6.14	1.67	6.49	3.64	5.09	4.44	2.57	10.63	3.55	5.05	7.18	3.96	7.97	6.24	1.01
95	UACH1001	24.87	22.78	12.78	11.71	10.3	6.09	1.69	6.2	3.9	4.92	4.22	2.5	10.05	3.47	4.87	6.77	4	8.62	6.35	1.04
96	UACH1002	25.41	23.03	12.86	11.32	10.48	6.01	1.72	6.25	3.53	5.15	4.37	2.32	10.39	3.55	4.87	6.84	4.01	8.46	6.96	1.04
97	UACH1012	26.15	23.29	12.85	12.03	10.41	6.18	1.87	6.77	3.8	5.01	3.93	2.04	10.28	3.58	4.93	5.75	4.24	7.8	5.98	1.19
98	UACH1018	26.21	23.43	12.93	11.65	9.94	5.86	1.8	6.39	3.71	5.04	4.04	2.17	10.64	3.86	4.94	6.12	4.34	8.07	5.47	1.41
99	UACH1019	25.97	23.52	12.6	11.25	10.39	6.05	1.59	6.54	3.74	5.08	4.22	2.3	10.13	3.38	4.72	5.54	3.99	8.07	6.29	1.14
100	UACH1022	25.94	23.03	13.16	11.68	10.24	5.98	1.79	6.43	3.84	5.25	4.08	2.24	9.93	3.34	4.9	5.96	4.28	8.1	6.04	1.45
101	UACH1023	25.92	23.36	13.19	11.82	10.04	6.39	1.93	6.39	3.81	4.95	4.01	2.26	10.28	3.66	4.93	6.01	4.34	7.01	6.09	1.36
102	UACH1198	26.48	23.84	12.66	11.63	10.69	5.91	1.97	6.76	3.67	5.11	4.81	2.22	10.07	3.78	4.23	6.29	4.56	8.02	6.51	1.46
103	UACH1202	26.16	23.09	12.67	11.59	10.39	5.95	1.92	6.87	3.39	4.88	4.43	2.01	10.16	3.93	4.14	6.45	4.78	7.12	6.54	1.57
104	UACH1207	25.35	22.66	12.52	10.81	9.81	6.01	1.86	6.53	3.81	4.87	4.58	1.91	9.53	3.87	3.99	5.32	4.45	7.28	6.09	1.46
105	UACH1208	25.65	22.66	12.65	11.6	10.23	5.84	1.93	6.67	3.46	4.96	4.43	1.99	9.66	3.59	4.19	7.11	4.54	7.52	6.53	1.43
106	UACH1213	25.15	21.93	11.79	11.3	9.85	5.68	1.91	6.69	3.21	4.89	4.31	2.02	10.01	3.63	4.37	5.83	4.46	7.52	6.23	1.51
107	UACH1214	24.92	22.04	11.76	11.24	10.06	5.44	1.94	6.53	3.3	4.9	4.05	2.01	9.24	3.32	4.38	5.71	4.36	7.63	6.29	1.41
108	UACH1215	25.55	22.56	12.57	11.9	10.12	5.37	1.7	6.59	3.41	5.06	4.03	1.84	10.21	3.28	4.78	6.14	4.6	8.37	5.78	1.38
109	UACH1215	25.68	22.77	12.48	12.09	9.94	5.77	1.74	6.67	3.36	5.04	4.73	1.75	10.31	3.48	4.62	6.19	4.83	8.04	6.06	1.33
110	UACH1217	26.38	23	12.67	11.87	10.34	6.17	1.89	6.41	3.5	5.19	3.99	2.09	10.41	3.29	4.54	6.14	4.43	7.54	6.7	1.32
111	UACH1219	24.68	22.03	12.23	11.5	9.68	5.89	1.61	6.13	3.35	4.67	4.16	1.95	9.58	3.37	4.25	5.59	4.19	7.35	5.43	1.58
112	UACH1222	25.31	22.41	12.34	11.75	10.37	5.94	1.69	6.68	3.45	4.92	4.55	2.08	9.86	3.47	4.42	5.91	4.66	7.61	5.91	1.41
113	UACH1225	25.22	22.43	11.98	11.51	10.04	5.58	1.98	6.69	3.67	4.93	4.29	1.97	9.59	3.86	4.35	6.09	4.64	7.53	6.12	1.45
114	UACH1227	25.2	22.43	12.23	11.67	9.77	5.83	1.85	6.52	3.42	5.05	4.44	1.89	9.14	3.31	4.34	6.13	4.58	8.78	6.35	1.49
115	UACH1228	25.73	22.68	12.61	11.59	10.15	5.76	1.86	6.67	3.65	5.04	4.61	2.07	9.89	3.22	4.13	5.99	4.7	7.73	6.38	1.39
116	UACH1235	24.05	20.78	11.99	11.91	9.35	5.6	1.57	5.72	3.45	4.45	3.94	1.72	8.93	2.96	4.14	5.78	4.42	7.56	6.58	1.26
117	UACH1237	26.35	23.64	12.86	11.57	10.65	6.18	2.03	6.65	3.73	5.04	4.15	2.05	10.5	3.65	4.84	5.87	4.39	7.09	6.67	1.09
118	UACH1238	26.44	23.73	12.92	11.66	10.68	6.34	2	6.76	3.64	5.14	4.61	2.05	10.54	3.99	4.34	6.11	4.99	6.81	6.98	1.47
119	UACH1241	26.34	23.5	12.95	11.55	10.56	5.76	2.08	6.71	3.51	5.09	4.78	2.16	10.33	3.58	4.11	5.87	4.76	8.14	6.28	1.59
120	UACH1242	26.01	23.52	12.94	11.51	10.6	6.25	2.15	6.73	3.56	5.11	4.28	2.05	10.33	3.75	4.7	5.71	4.17	6.99	6.28	1.65
121	UACH1246	26.51	23.55	12.65	11.77	10.59	6.27	1.8	6.52	3.52	4.94	4.06	2.27	9.24	3.31	4.61	6.08	4.19	8.57	6.04	1.15
122	UACH1247	26.68	23.52	12.65	11.89	10.44	6.23	1.83	6.86	3.54	4.89	4.27	2.29	10.31	3.48	4.21	6.09	4.62	7.64	6.63	1.42
123	UACH1256	25.51	22.77	12.29	11.49	10.1	5.9	1.79	6.55	3.57	4.81	3.94	1.78	10.44	3.23	4.34	6.06	4.4	7.75	6.09	1.43
124	UACH1257	25.64	22.79	12.35	11.61	10.32	6.18	1.81	6.61	3.55	4.85	4.66	2.05	10.22	3.18	4.46	5.96	4.44	7.93	6.05	1.48
125	UACH1263	25.23	22.51	12.09	11.52	9.94	6.01	1.89	6.41	3.28	4.86	4.37	1.94	9.56	3.55	4.22	5.86	4.35	8.13	6.58	1.36
126	UACH1273	26.01	23.07	11.81	11.35	10.04	5.91	1.63	6.61	3.39	4.96	3.94	2.1	9.75	3.45	4.47	5.84	4.29	8.15	6.28	1.3
127	UACH1275	26.17	22.88	12.75	11.47	10.05	5.64	1.82	6.65	3.45	5.12	3.94	1.96	10.46	3.59	4.92	5.99	4.4	7.56	6.1	1.41
128	UACH1276	26.22	23.09	12.79	11.61	10.12	5.78	1.86	6.69	3.44	5.16	4.63	1.92	10.01	3.54	4.42	6.11	4.89	7.76	6.34	1.54
129	UACH1286	25.05	22	11.48	11.55	9.47	6.01	1.71	6.22	3.26	4.65	3.9	1.58	9.61	3.17	4.39	5.73	4.06	7.85	5.81	1.23
130	UACH1287	23.38	20.56	11.52	11.31	9.2	5.21	1.69	6.08	3.15	4.55	3.84	1.7	9.05	2.87	3.88	5.7	4.28	7.01	6.19	1.23
131	UACH1288	25.12	22.07	11.49	11.69	9.67	5.87	1.78	6.34	3.32	4.58	4.21	1.77	9.65	3.83	4.1	5.58	4.56	7.23	6.36	1.59
132	UACH1289	25.8	22.61	12.23	11.83	10.06	6.01	1.64	6.12	3.43	4.65	4.27	2.03	9.42	3.24	4.58	5.98	4.51	8.91	6.53	1.43
133	UACH1294	26.03	22.93	11.89	11.53	10.07	5.94	1.83	6.64	3.31	4.72	4.24	2.19	10.71	3.22	4.11	6.02	4.52	7.74	6.32	1.28
134	UACH1295	25.43	22.32	11.78	11.4	10.11	6.19	1.91	6.68	3.46	4.83	4.66	2.22	10.01	3.46	4.19	5.54	4.43	8.06	6.62	1.47
135	UACH1331	24.36	21.83	12.39	11.85	10.31	5.95	1.75	6.43	3.53	4.87	4.35	1.96	9.53	2.89	4.32	5.43	4.26	7.93	5.77	1.61
136	UACH1333	26	23.27	12.64	11.44	10.49	5.87	2.07	6.68	3.47	5.07	4.36	2.2	9.77	3.26	4.41	5.85	4.34	8.48	6.31	1.49
137	UACH1334	25.39	22.87	12.28	11.93	10.61	6.25	1.96	6.72	3.52	4.88	4.15	1.8	9.89	3.29	4.39	5.74	4.55	8.17	5.89	1.22
138	UACH1335	25.01	22.23	12.52	11.9	10.04	6.16	1.71	6.48	3.31	4.88	4.24	2.01	9.88	3.34	4.31	5.57	4.3	7.18	6.54	1.29
139	UACH1336	24.21	21.9	11.8	11.09	9.63	5.56	1.82	6.15	3.24	4.7	4	1.84	8.98	3.18	4.35	5.58	4.33	8.12	5.79	1.43
140	UACH1337	25.31	22.78	12.12	11.29	9.86	5.57	1.9	6.44	3.5	4.97	4.34	1.95	9.61	3.41	4.66	5.9	4.38	7.57	5.58	1.36
141	UACH1346	25.63	22.84	12.12	11.31	10.48	6.04	1.81	6.58	3.63	5.2	4.21	1.95	9.93	3.2	4.31	5.78	4.32	8	5.67	1.42
142	UACH1369	26.7	23.92	13.41	11.52	10.65	5.94	1.73	6.59	3.86	5.18	4.58	2.14	10.77	3.05	5.15	7.17	3.82	8.99	6.47	1.02
143	UACH1384	24.51	21.81	12.74	11.27	9.33	5.06	1.63	5.8	3.5	4.87	4.07	1.95	9.7	3.16	4.47	6.63	4.4	8.76	6.16	1.13
144	UACH1402	25.57	23.4	13.1	11.34	10.27	6.45	1.72	6.52	3.92	5.02	4.2	2.32	10.02	3.07	4.5	6.28	3.95	8.33	6.72	1.33
145	UACH1419	25.93	23.66	13.26	11.81	10.5	5.98	1.78	6.35	4.35	5.38	4.81	2.35	10.47	3.56	4.77	6.96	4.36	7.42	7.55	1.24
146	UACH1421	25.79	24.08	13.06	12.02	10.65	5.69	1.63	6.57	4.06	5.28	4.49	2.17	10.42	3.3	4.99	5.79	4.23	7.97	6.65	1.23
147	UACH192	25.78	23.37	13.04	11.67	10.42	5.71	1.72	6.55	3.76	5.37	4.87	2.76	10.05	3.87	4.16	6.19	4.81	8.54	5.74	1.63
148	UACH195	26.62	23.87	12.87	11.64	10.66	6.19	1.84	6.94	3.86	5.18	4.72	2.27	9.12	3.79	4.06	5.88	4.69	8.92	6.11	1.54
149	UACH1979	25.64	22.89	12.4	10.91	9.93	5.99	1.78	6.43	3.65	5.13	4.1	2.01	9.97	3.72	4.83	5.82	4.08	8.26	6.29	1.18
150	UACH1986	25.06	22.33	12.44	11.61	9.73	5.48	1.68	6.12	3.83	5	3.85	2.06	8.94	3.48	4.5	6.02	4.36	8.2	5.77	1.1
151	UACH1987	27.09	24.04	13.18	12.01	10.36	5.94	1.81	6.04	3.95	5.16	4.09	2.33	10.36	3.78	4.86	6.15	4.34	8.39	6.12	1.21
152	UACH1989	26.79	23.6	13.23	11.68	10.18	6.06	1.81	6.56	3.71	5.04	4.06	2.4	10.7	3.83	4.83	5.93	4.28	7.62	6.42	1.27
153	UACH2009	24.46	21.42	11.98	11.6	9.5	5.33	1.86	5.88	3.65	4.69	3.89	1.81	9.01	3.13	4.44	5.95	4.1	7.62	6.12	1.21
154	UACH208	25.74	22.83	12.57	11.47	10.08	5.83	1.69	6.25	3.79	5.08	4.67	1.86	9.52	3.89	4.27	5.97	4.71	8.22	6.05	1.54
155	UACH211	25.35	22.48	12.49	10.76	10.46	5.14	1.75	6.22	3.64	4.47	4.07	2.2	10.15	2.84	4.5	6.28	3.85	8.51	5.76	1.25
156	UACH2119	23.22	20.01	11.63	11.03	8.47	4.88	1.53	5.43	3.54	4.68	4.17	1.79	9.03	2.87	4.22	5.54	3.86	7.21	5.47	1.13
157	UACH212	25.05	22.54	12.74	11.86	9.91	5.96	1.68	6.26	3.76	4.94	4.39	2.24	9.78	3.98	4.04	6.28	4.95	7.57	6.81	1.44
158	UACH2120	25.02	22.67	12.84	11.03	9.6	5.85	1.78	6.22	3.75	4.98	4.09	1.95	10.28	3.35	4.31	5.87	4	7.52	5.34	1.16
159	UACH2124	23.32	20.34	11.66	10.97	8.76	4.81	1.66	5.63	3.44	4.83	4.05	1.89	9.09	3.1	4.43	5.53	4.04	7.39	5.46	1
160	UACH2127	24.58	22.39	12.33	10.68	9.51	5.72	1.65	6.17	3.62	4.69	3.82	2.17	10.64	3.23	4.34	5.71	4.05	7.37	5.37	1.19
161	UACH213	26.13	22.62	12.6	11.77	9.89	6.18	1.89	6.25	3.69	5.14	4.67	2.26	10.36	3.58	4.23	6.04	4.87	7.19	5.92	1.62
162	UACH214	26.13	23.07	13.06	11.77	9.97	6.09	1.84	6.34	3.93	5.04	4.59	2.38	9.33	3.96	4.34	6.03	4.68	7.77	6.19	1.41
163	UACH215	25.91	22.97	12.94	11.17	9.91	5.9	1.82	6.3	3.62	5.11	4.4	2.08	10.55	3.39	4.4	5.62	4.4	8.26	6.47	0.95
164	UACH215	23.65	21.07	11.88	11.28	9.15	5.19	1.65	5.95	3.46	4.67	4.04	1.79	8.63	2.81	4.08	5.53	4.06	7.24	5.82	1.14
165	UACH216	26.38	24.08	12.89	11.36	10.65	6.21	1.96	6.52	3.78	5.15	4.61	2.37	8.61	4.24	4.16	6.08	4.85	9.37	6.37	1.42
166	UACH220	24.94	22.47	12.41	11.16	9.87	6.15	1.8	6.09	3.7	4.85	4.23	1.97	10.55	3.04	4.43	6.47	4.07	8.56	6.1	0.99
167	UACH221	26.9	24.4	13.6	12.32	10.53	6.36	1.9	6.57	4.49	5.41	4.77	2.6	10.47	3.28	5.05	6.32	4.46	9.31	6.6	1.25
168	UACH222	25.66	23.19	12.99	11.14	10.35	5.88	1.78	6.66	3.84	5.1	4.15	2.03	10.5	3.5	4.5	5.45	4.25	8.81	5.77	0.88
169	UACH223	26.08	23.43	13.2	11.19	10.37	6.07	1.85	6.92	3.68	5.35	4.72	2.38	10.72	3.5	4.63	5.75	4.27	9.22	5.71	1.32
170	UACH229	24.84	22.18	13.03	10.93	9.92	5.94	1.75	6.12	3.88	5.08	4.52	2.18	10.98	3.62	4.66	6.25	3.99	7.82	6.76	1.23
171	UACH231	25.83	23.12	12.42	10.87	10.35	6.11	1.76	6.82	3.82	5.03	4.58	2.31	10.1	3.57	4.23	5.85	4.84	7.63	6.05	1.58
172	UACH232	25.24	22.36	12.68	11.52	9.98	5.33	1.92	6.35	3.89	5.11	4.74	2.43	9.39	3.85	4.35	5.88	4.83	8.27	5.96	1.45
173	UACH233	25.68	23.04	12.61	10.79	10.16	5.54	1.66	6.43	3.62	5.21	4.61	2.19	9.37	3.76	3.95	5.86	4.71	8.15	6.55	1.43
174	UACH234	24.85	21.85	12.38	11.28	9.67	6.07	1.75	5.96	3.92	4.97	4.11	2.06	10.12	3.27	4.71	6.79	4.16	8.52	6.06	0.92
175	UACH236	25.27	22.62	12.86	10.84	9.55	5.64	1.76	6.25	3.94	5.15	4.48	2.02	10.18	3.65	4.75	5.95	4.29	8.46	6.61	1.23
176	UACH237	25.61	23.16	12.72	11.05	10.03	6.08	1.93	6.44	3.56	5.35	4.68	2.02	10.47	3.46	4.73	5.79	4.09	8.54	6.15	1.11
177	UACH238	25.35	23.02	12.03	11.32	10.15	6.06	1.9	6.71	3.54	5.18	4.42	2.17	10.48	3.32	4.8	5.98	4.33	7.78	5.97	1.27
178	UACH239	24.45	21.66	11.98	11.74	9.57	5.76	1.76	5.9	3.7	4.8	4.34	1.78	9.43	3.49	4.33	5.84	4.47	7.18	6.28	1.51
179	UACH2392	23.14	22.89	13.27	11.82	10.11	6.08	1.79	6.38	3.74	5.09	4.29	2.16	9.42	3.2	4.47	6.66	3.95	8.41	7.72	1.15
180	UACH2395	25.38	23.48	12.68	11.17	10.37	6.25	1.59	6.35	4.18	5.19	4.38	2.32	9.94	2.88	4.5	6.71	4.44	8.17	6.55	1.1
181	UACH246	25.25	22.35	12.1	11.21	9.87	6.21	1.88	6.35	3.62	4.77	4.37	2.04	9.25	3.56	4.19	5.72	4.33	7.31	6.34	1.32
182	UACH2690	26.97	24.72	13.5	12.05	10.92	6.54	1.98	6.8	3.95	5.22	4.44	2.3	11.11	3.66	4.81	5.91	4.04	8.66	7.26	1.15
183	UACH2692	26.83	24.43	13.9	11.82	10.99	6.62	2.1	7.16	3.57	5.41	4.31	2.54	11.02	3.61	5.02	5.97	4.16	8.03	7.1	1.35
184	UACH3614	25.89	24.32	13.66	12.06	10.66	6.76	1.79	6.45	3.95	5.43	4.59	2.52	10.64	3.5	4.73	5.58	4.06	7.24	6.86	1.32
185	UACH3754	28.41	26.07	14.19	12.46	11.85	7.06	1.72	7.27	4.28	5.68	4.81	3.03	11.74	4.02	5.57	6.24	4.14	8.73	7.18	1.08
186	UACH3755	26.84	24.83	14.83	12.32	11.27	6.8	1.86	7.2	4.1	6.01	5.02	2.53	11.31	3.64	5.43	6.02	4	9.12	6.36	0.84
187	UACH3769	26.29	24.27	13.77	12.02	11	6.09	1.83	6.98	3.6	5.53	4.64	2.34	10.59	3.61	5.15	5.93	4.02	8.14	6.64	1.27
188	UACH4420	25.88	23.65	12.78	10.87	10.59	6.78	1.98	6.7	3.1	5.07	4.39	2.08	10.71	3.26	5.08	6.44	3.99	8.39	7.24	1.41
189	UACH4423	25.03	22.7	12.11	11.75	9.88	6.28	1.93	6.01	4.04	4.99	4.43	2.28	9.76	3.26	4.79	6.83	4.2	8.77	5.76	1.14
190	UACH5001	25.34	23.36	13.58	11.57	10.61	5.98	1.8	6.32	4.05	5.2	4.64	2.2	9.95	3.47	5	5.86	3.91	9.03	6.2	0.79
191	UACH5002	25.47	22.96	13.34	11.62	10.17	5.77	1.9	6.08	3.83	5.16	4.27	2.41	10.59	2.97	4.93	6.82	4.36	8.26	6.17	1.15
192	UACH5005	25.24	22.38	12.64	11.54	9.96	5.99	1.71	5.67	4.06	5.11	4.43	2.16	9.89	3.26	4.87	6.16	4.17	8.08	7.14	1.13
193	UACH5007	26.68	23.99	13.76	11.94	10.37	6.64	1.91	6.37	4.28	5.3	4.79	2.26	10.74	3.68	4.88	7.13	3.93	9.04	7.13	1.32
194	UACH5008	24.67	22.4	12.77	11.17	10.05	5.54	1.81	6.04	3.86	5.22	4.13	2.26	9.85	3.59	4.85	6.23	3.91	7.67	6.42	1.75
195	UACH5010	25.48	22.68	13.47	12.17	9.85	6.35	1.71	5.84	4.08	5.18	4.57	2.03	9.89	3.04	4.56	5.86	3.99	8.64	6.47	1.28
196	UACH5012	26.84	24.97	14.54	12.44	10.7	5.8	2.03	6.45	4.29	5.51	4.67	2.28	11.12	3.68	4.52	6.71	4.35	8.63	7.11	1.25
197	UACH5013	24.48	22.12	12.74	11.49	9.83	5.68	1.8	5.79	3.82	5.05	4.42	2.24	9.43	3.24	4.57	6.62	4.01	8.37	6.62	1.07
198	UACH5033	25.53	23.38	13.54	12.69	10.16	6.18	1.9	6.15	3.8	5.27	4.39	2.23	9.34	3.52	5.29	6.74	3.97	8.67	6.52	1.39
199	UACH5034	26.67	24.6	14.01	12.12	10.69	5.85	1.87	6.39	4.24	5.39	4.62	2.57	9.37	3.36	4.93	7.26	4.17	9.06	7.21	0.99
200	UACH5364	27.01	24.74	14.4	12.58	11.05	6.15	1.88	6.61	4.09	5.77	4.59	2.73	11	3.58	5.25	6.32	4.26	7.93	6.54	1.58
201	UACH5365	24.35	22.11	13.22	12.11	9.67	5.5	1.9	6.05	4.03	5.03	4.08	1.88	9.42	3.29	5.07	5.34	4.26	7.62	6.76	1.23
202	UACH5366	25.78	23.23	13.43	11.65	10.48	5.96	1.77	6.16	3.99	5.19	4.5	2.23	9.74	3.4	5.12	5.91	4.39	8.88	6.32	1.24
203	UACH5367	27.23	25.33	13.69	11.96	11.08	6.49	2.03	6.82	3.83	5.45	4.84	2.12	10.32	3.82	5.17	5.82	4.1	8.53	5.95	1.17
204	UACH5368	26.63	24.38	14.42	12.47	10.73	6.08	1.79	6.4	4.29	5.29	4.5	2.5	10.49	3.35	5.07	6.03	4.32	9.39	7.21	1.12
205	UACH5369	26.5	24.36	13.71	11.98	10.85	5.99	1.98	6.69	4	5.55	4.7	2.42	10.87	3.38	5.32	5.95	4.3	7.99	6.03	1.28
206	UACH5370	26.41	24.28	14.49	12.04	11.05	6.52	2.01	6.84	3.9	5.51	4.79	2.32	9.98	3.24	5	6.47	4.24	8.47	6.93	1.38
207	UACH5371	25.37	23.61	13.41	11.66	10.36	6	1.7	5.98	4.09	5.25	4.18	2.1	10.07	3.29	4.59	5.75	3.87	7.67	6.91	1.18
208	UACH5372	23.71	21.69	13.33	11.56	9.56	5.5	1.88	5.75	4.1	5.25	4.4	2.11	9.13	3.3	4.71	5.35	4.07	8.36	7.12	1.28
209	UACH5375	26.51	24.57	15.11	12.46	11.39	6.81	2.13	7.26	3.93	5.81	5.03	2.77	10.62	3.71	5.68	6.17	4.27	7.84	6.33	1.2
210	UACH5376	28.1	26.1	14.71	12.07	11.58	6.94	1.88	7.12	4.14	5.45	4.65	2.82	10.75	3.9	5.37	6.19	4.27	9.62	6.68	1
211	UACH5380	26.9	24.57	14.06	12.11	11.08	6.47	2.05	6.38	4.04	5.39	4.58	2.37	10.3	3.88	5.88	7.43	4.12	8.71	6.91	1.38
212	UACH5383	26.81	24.97	14.5	12.01	11.31	7.18	1.82	7.17	3.99	5.46	4.92	2.26	10.57	3.77	5.19	7.14	4.27	8.33	7.61	1.38
213	UACH5385	26.07	24.14	13.81	12.22	10.81	6.46	1.62	6.58	3.97	5.3	4.74	2.45	10.47	3.25	4.88	7.44	3.97	8.04	7.73	1
214	UACH5387	24.84	22.42	12.66	11.4	9.68	5.94	1.8	5.45	4.07	5.23	4.64	2.1	9.76	3.46	5.05	6.42	4.09	7.72	6.58	1.03
215	UACH5601	25.05	23.07	13.16	11.49	10.69	6.59	1.88	6.47	4.14	5.25	4.33	2.48	9.63	2.81	4.82	5.65	4.24	7.76	6.2	1.24
216	UACH72	25.15	22.64	12.44	11.46	10.14	5.79	1.69	6.4	3.86	5.04	4.12	1.87	9.96	3.12	4.18	5.86	4.11	7.41	6.07	1.08
217	UACH73	25.68	24.34	14.07	12.29	10.64	5.45	1.76	6.5	3.92	5.28	4.77	2.67	9.68	3.47	5.17	5.87	4.3	8.14	5.46	1.1
218	UACH74	26.07	24.55	13.6	12.61	10.7	5.79	1.64	6.6	3.77	5.21	4.55	2.67	8.99	3.44	4.76	5.64	4.2	9.47	5.94	1.19
219	UACH74	26.05	24.5	13.67	12.29	10.53	5.85	1.7	6.65	3.91	5.21	4.6	2.6	9.88	3.67	4.58	5.79	4.19	8.84	5.42	1.4
220	UACH75	26.14	25.03	14	12.15	11.02	5.95	1.73	6.97	4.25	5.79	5.01	2.6	10.18	2.75	5.45	5.91	4.29	7.59	6.73	1.34
221	UACH76	25.59	22.7	12.38	11.25	10.07	5.86	1.77	6.25	3.89	5.11	4.24	1.77	9.75	3.27	4.28	5.35	4.09	6.94	6.01	1.29
222	UACH77	24.91	23.27	13.73	12.84	10.3	5.6	1.72	6.51	3.88	5.41	4.77	2.35	8.93	3.38	5.35	6.79	4.17	8.19	5.81	1.31
223	UACH77	25.01	23.34	13.77	12.6	10.44	5.74	1.7	6.29	3.99	5.35	4.83	2.27	8.72	3.33	5.26	6.18	4.17	8.37	5.9	1.21
224	UACH78	25.44	23.12	12.79	12.14	10.13	5.72	1.79	6.05	4.28	5.18	4.63	2.37	9.93	2.99	4.6	5.93	4.26	7.82	6.43	1.09
225	UACH79	26.6	24.38	14.03	12.5	10.99	5.85	1.76	6.6	4.32	5.51	4.51	2.54	10.03	3.24	5.33	6.18	4.42	7.93	6.6	1.28
226	UACH80	26.35	24.98	14.1	12.53	11.01	6.47	1.77	7.1	4.12	5.66	4.88	2.71	9.98	3.42	4.93	6.38	4.19	8.03	5.64	1.27
227	UACH81	25.28	23.78	13.77	12.28	10.58	6.24	1.81	6.22	4.53	5.66	4.68	2.31	10.29	3.66	5.52	5.82	4.6	7.93	5.98	1.37
228	UACH81	25.44	23.83	13.85	12.53	10.49	6.2	1.84	6.3	4.42	5.73	4.95	2.4	9.5	3.67	5.45	6.12	4.62	7.98	5.84	1.29
229	UACH82	24.25	23.14	13.16	11.91	10	5.61	1.82	5.88	4.27	5.2	4.52	2.32	9.65	3.99	4.73	6.01	4.13	8.32	6.41	1.01
230	UACH83	26.53	24.97	13.86	12.63	11.05	6.39	1.78	7.06	4.01	5.7	4.62	2.66	9.86	3.4	5.36	6.05	4.18	7.95	6.15	1.46
231	UACH84	25.74	23.5	13.01	11.76	10.23	5.95	1.62	6.42	4.26	5.36	4.79	2.66	9.51	3.04	4.95	6.13	4.24	7.88	6.02	1.18
232	UACH87	25.64	23.57	13.08	12.04	10.63	5.19	1.68	6.55	4.14	5.05	4.38	2.52	9.69	3.52	4.99	5.86	4.52	8.33	6.17	1.54
233	UACH88	25.78	23.38	13.14	11.59	10.75	6	1.65	6.39	4.59	5.29	4.59	2.51	10.54	3.21	4.86	7.28	4.5	8.14	6.08	1.16
234	UACH998	26.42	23.96	13.62	11.75	10.9	6.66	1.89	6.67	3.99	5.22	4.49	2.42	10.39	3.66	5.39	7.26	4.09	8.67	6.75	0.97
235	UACH999	25.65	23.16	12.81	11.35	10.26	6.01	1.75	6.31	4.02	5.03	4.31	2.25	10.78	3.12	4.68	5.98	4.16	7.99	6	1

## Sheet: Climate
case	id_specimen	Bio_01	Bio_02	Bio_03	Bio_04	Bio_05	Bio_06	Bio_07	Bio_08	Bio_09	Bio_10	Bio_11	Bio_12	Bio_13	Bio_14	Bio_15	Bio_16	Bio_17	Bio_18	Bio_19	Humidity
1	CMI_FBM470	9.7	116	51	4020	227	2	225	53	149	149	46	2175	318	71	46	905	276	276	873	22.423
2	CMI_FBM505	9.7	116	51	4020	227	2	225	53	149	149	46	2175	318	71	46	905	276	276	873	22.423
3	CMI181	9.7	116	51	4020	227	2	225	53	149	149	46	2175	318	71	46	905	276	276	873	22.423
4	CMI182	9.7	116	51	4020	227	2	225	53	149	149	46	2175	318	71	46	905	276	276	873	22.423
5	CMI2153	10.3	162	53	5160	261	-42	303	161	65	168	36	355	35	22	11	94	79	91	92	3.447
6	CMI2166	1.9	145	56	4343	161	-97	258	-29	74	74	-37	517	92	13	68	262	44	44	245	27.211
7	CMI2167	1.9	145	56	4343	161	-97	258	-29	74	74	-37	517	92	13	68	262	44	44	245	27.211
8	CMI2188	1.9	145	56	4343	161	-97	258	-29	74	74	-37	517	92	13	68	262	44	44	245	27.211
9	CMI4926	1.7	145	55	4377	159	-101	260	-32	72	72	-40	506	89	14	65	250	47	47	233	29.765
10	CMI4940	1.7	145	55	4377	159	-101	260	-32	72	72	-40	506	89	14	65	250	47	47	233	29.765
11	CMI4953	2.2	145	55	4386	165	-95	260	-26	78	78	-34	514	90	13	68	257	46	46	241	23.364
12	CMI7049	8	152	54	4661	234	-44	278	27	139	139	19	600	113	14	70	310	49	49	299	7.5
13	CMI7051	8	152	54	4661	234	-44	278	27	139	139	19	600	113	14	70	310	49	49	299	7.5
14	CMI7060	8	152	54	4661	234	-44	278	27	139	139	19	600	113	14	70	310	49	49	299	7.5
15	CMI7345	9.7	155	54	4697	249	-34	283	44	158	158	37	372	48	16	35	141	59	59	137	3.835
16	CNP1136	10.3	124	48	5004	245	-13	258	43	156	167	38	170	23	9	30	63	28	31	55	1.65
17	CNP1149	9.4	109	47	4516	222	-7	229	62	122	151	36	185	25	10	32	68	32	32	59	1.968
18	CNP1268	10.3	124	48	5004	245	-13	258	43	156	167	38	170	23	9	30	63	28	31	55	1.65
19	CNP1284	10	129	50	4730	245	-11	256	45	161	161	39	298	55	9	61	141	31	31	119	2.98
20	CNP2156	11.1	105	47	4344	234	13	221	80	137	166	55	203	29	10	36	77	33	37	65	1.829
21	CNP2157	11.1	105	47	4344	234	13	221	80	137	166	55	203	29	10	36	77	33	37	65	1.829
22	CNP2163	11.1	105	47	4344	234	13	221	80	137	166	55	203	29	10	36	77	33	37	65	1.829
23	CNP2210	11.1	105	47	4344	234	13	221	80	137	166	55	203	29	10	36	77	33	37	65	1.829
24	CNP2254	12.8	101	45	4386	247	25	222	97	127	183	73	184	36	5	52	80	22	36	64	1.438
25	CNP2265	11.1	105	47	4344	234	13	221	80	137	166	55	203	29	10	36	77	33	37	65	1.829
26	CNP2534	2.5	79	52	2763	106	-45	151	25	9	58	-12	666	67	41	13	191	135	173	161	26.64
27	CNP2535	5.5	80	46	3484	151	-21	172	27	39	100	11	333	37	17	23	102	55	92	77	6.055
28	CNP2541	10.1	101	47	4333	215	4	211	49	103	152	44	222	28	11	27	78	40	51	65	2.198
29	CNP2543	9.8	102	48	4344	213	1	212	46	100	149	41	218	27	12	25	77	40	48	66	2.224
30	CNP2550	5.3	80	46	3399	148	-23	171	26	36	96	9	333	36	17	22	101	55	93	77	6.283
31	CNP2551	2.5	79	52	2763	106	-45	151	25	9	58	-12	666	67	41	13	191	135	173	161	26.64
32	CNP2552	10.1	101	47	4333	215	4	211	49	103	152	44	222	28	11	27	78	40	51	65	2.198
33	CNP2557	8.1	105	48	4409	197	-20	217	46	61	134	22	184	22	9	22	55	32	53	46	2.272
34	CNP2560	10.1	101	47	4333	215	4	211	49	103	152	44	222	28	11	27	78	40	51	65	2.198
35	CNP2563	2.5	79	52	2763	106	-45	151	25	9	58	-12	666	67	41	13	191	135	173	161	26.64
36	CNP2565	4.8	77	52	2728	128	-20	148	48	33	82	12	641	62	40	13	181	132	166	159	13.354
37	CNP2596	5.7	79	50	2883	141	-15	156	76	56	93	19	465	47	28	15	132	93	131	109	8.158
38	CNP2598	6.6	68	45	3100	151	0	151	105	62	105	26	262	30	12	27	80	42	80	62	3.97
39	CNP2602	5.5	77	51	2765	135	-15	150	55	40	88	18	587	56	38	12	164	124	153	145	10.673
40	CNP2608	5.5	77	51	2765	135	-15	150	55	40	88	18	587	56	38	12	164	124	153	145	10.673
41	CNP2618	5.5	77	51	2765	135	-15	150	55	40	88	18	587	56	38	12	164	124	153	145	10.673
42	CNP2620	5.5	77	51	2765	135	-15	150	55	40	88	18	587	56	38	12	164	124	153	145	10.673
43	CNP2632	5.7	79	50	2883	141	-15	156	76	56	93	19	465	47	28	15	132	93	131	109	8.158
44	CNP2654	5.5	77	51	2765	135	-15	150	55	40	88	18	587	56	38	12	164	124	153	145	10.673
45	CNP2655	5.5	77	51	2765	135	-15	150	55	40	88	18	587	56	38	12	164	124	153	145	10.673
46	CNP2664	2.5	79	52	2763	106	-45	151	25	9	58	-12	666	67	41	13	191	135	173	161	26.64
47	CNP2671	5.7	79	50	2883	141	-15	156	76	56	93	19	465	47	28	15	132	93	131	109	8.158
48	CNP2683	5.5	77	51	2765	135	-15	150	55	40	88	18	587	56	38	12	164	124	153	145	10.673
49	CNP2901	10.1	101	47	4333	215	4	211	49	103	152	44	222	28	11	27	78	40	51	65	2.198
50	CNP2902	7.9	105	45	4815	199	-34	233	80	129	137	16	153	21	5	35	53	21	22	46	1.937
51	CNP2907	10.1	101	47	4333	215	4	211	49	103	152	44	222	28	11	27	78	40	51	65	2.198
52	CNP2932	5.7	79	50	2883	141	-15	156	76	56	93	19	465	47	28	15	132	93	131	109	8.158
53	CNP331	7.7	127	51	4495	218	-27	245	26	125	134	19	674	116	17	61	328	66	67	306	8.753
54	CNP409	10	129	50	4730	245	-11	256	45	161	161	39	298	55	9	61	141	31	31	119	2.98
55	CNP4335	7.3	102	44	4618	191	-38	229	72	104	128	12	175	20	11	22	57	33	35	47	2.397
56	CNP4337	8.4	137	49	5317	238	-40	278	21	140	152	15	169	21	8	25	57	28	33	50	2.012
57	CNP4479	5.6	98	48	3945	168	-35	203	8	105	105	3	706	99	28	40	279	106	106	252	12.607
58	CNP4485	7.5	89	44	4073	179	-20	199	46	125	125	21	377	44	19	31	126	59	59	122	5.027
59	CNP4488	7.5	89	44	4073	179	-20	199	46	125	125	21	377	44	19	31	126	59	59	122	5.027
60	CNP4505	7.5	89	44	4073	179	-20	199	46	125	125	21	377	44	19	31	126	59	59	122	5.027
61	CNP4544	8.1	136	49	5268	234	-42	276	18	137	148	13	167	21	7	28	58	26	31	52	2.062
62	CNP4549	8.4	137	49	5317	238	-40	278	21	140	152	15	169	21	8	25	57	28	33	50	2.012
63	CNP4559	7.3	102	44	4618	191	-38	229	72	104	128	12	175	20	11	22	57	33	35	47	2.397
64	CNP813	5.3	154	55	4827	215	-65	280	-2	116	116	-8	431	73	13	59	203	47	47	198	8.132
65	CNP863	9.5	142	49	5460	253	-36	289	93	39	164	25	190	22	11	19	56	40	44	45	2
66	CNP932	10	112	46	4773	229	-10	239	42	159	159	36	171	23	7	35	65	25	25	57	1.71
67	FMNH124544	2.8	68	49	2488	104	-33	137	30	12	59	-5	1225	131	87	12	358	275	308	284	43.75
68	FMNH23005	9.3	126	63	2675	192	-6	198	62	105	127	58	36	8	0	59	19	2	4	18	0.387
69	FMNH23006	9.3	126	63	2675	192	-6	198	62	105	127	58	36	8	0	59	19	2	4	18	0.387
70	FMNH23007	16	80	52	2487	239	87	152	128	192	192	128	53	22	0	126	42	0	0	42	0.331
71	FMNH23008	16	80	52	2487	239	87	152	128	192	192	128	53	22	0	126	42	0	0	42	0.331
72	FMNH23009	16	80	52	2487	239	87	152	128	192	192	128	53	22	0	126	42	0	0	42	0.331
73	MACN27824	5.4	76	51	2731	133	-14	147	54	39	88	18	666	64	42	12	189	138	171	165	12.333
74	MACN27827	5.4	76	51	2731	133	-14	147	54	39	88	18	666	64	42	12	189	138	171	165	12.333
75	MACN27841	5.4	76	51	2731	133	-14	147	54	39	88	18	666	64	42	12	189	138	171	165	12.333
76	MACN27844	5.4	76	51	2731	133	-14	147	54	39	88	18	666	64	42	12	189	138	171	165	12.333
77	MACN27845	5.4	76	51	2731	133	-14	147	54	39	88	18	666	64	42	12	189	138	171	165	12.333
78	MACN27848	5.4	76	51	2731	133	-14	147	54	39	88	18	666	64	42	12	189	138	171	165	12.333
79	MACN27850	5.4	76	51	2731	133	-14	147	54	39	88	18	666	64	42	12	189	138	171	165	12.333
80	MACN27851	5.4	76	51	2731	133	-14	147	54	39	88	18	666	64	42	12	189	138	171	165	12.333
81	MACN27853	5.4	76	51	2731	133	-14	147	54	39	88	18	666	64	42	12	189	138	171	165	12.333
82	MACN27854	5.4	76	51	2731	133	-14	147	54	39	88	18	666	64	42	12	189	138	171	165	12.333
83	MACN27855	5.4	76	51	2731	133	-14	147	54	39	88	18	666	64	42	12	189	138	171	165	12.333
84	MASTO312	4.2	81	52	2795	124	-30	154	64	24	76	5	625	71	33	25	203	107	190	129	14.881
85	MLP8-10-2-13	8.1	152	54	4609	234	-43	277	29	140	140	21	619	119	13	72	325	46	46	311	7.642
86	MLP8-10-2-14	8.1	152	54	4609	234	-43	277	29	140	140	21	619	119	13	72	325	46	46	311	7.642
87	MLP8-10-2-15	8.1	152	54	4609	234	-43	277	29	140	140	21	619	119	13	72	325	46	46	311	7.642
88	NHNM482127	4.8	80	52	2829	129	-24	153	70	29	82	10	594	67	32	24	190	103	180	124	12.375
89	NHNM482128	4.8	80	52	2829	129	-24	153	70	29	82	10	594	67	32	24	190	103	180	124	12.375
90	NHNM482129	4.8	80	52	2829	129	-24	153	70	29	82	10	594	67	32	24	190	103	180	124	12.375
91	NHNM482144	4.8	80	52	2829	129	-24	153	70	29	82	10	594	67	32	24	190	103	180	124	12.375
92	NHNM501220	5.3	65	48	2514	125	-8	133	73	25	84	20	3452	331	225	10	936	778	902	800	65.132
93	NHNM501221	5.3	65	48	2514	125	-8	133	73	25	84	20	3452	331	225	10	936	778	902	800	65.132
94	UACH1000	11.4	102	53	3131	226	35	191	81	156	156	75	992	236	11	90	583	42	42	557	8.702
95	UACH1001	11.4	102	53	3131	226	35	191	81	156	156	75	992	236	11	90	583	42	42	557	8.702
96	UACH1002	11.4	102	53	3131	226	35	191	81	156	156	75	992	236	11	90	583	42	42	557	8.702
97	UACH1012	11.4	98	51	3110	226	36	190	80	155	155	75	2293	370	62	60	1073	219	219	1041	20.114
98	UACH1018	11.4	98	51	3110	226	36	190	80	155	155	75	2293	370	62	60	1073	219	219	1041	20.114
99	UACH1019	11.4	98	51	3110	226	36	190	80	155	155	75	2293	370	62	60	1073	219	219	1041	20.114
100	UACH1022	11.4	98	51	3110	226	36	190	80	155	155	75	2293	370	62	60	1073	219	219	1041	20.114
101	UACH1023	11.4	98	51	3110	226	36	190	80	155	155	75	2293	370	62	60	1073	219	219	1041	20.114
102	UACH1198	10.7	50	44	2172	169	57	112	85	134	135	80	1959	292	79	48	834	251	258	797	18.308
103	UACH1202	10.7	50	44	2172	169	57	112	85	134	135	80	1959	292	79	48	834	251	258	797	18.308
104	UACH1207	10.7	50	44	2172	169	57	112	85	134	135	80	1959	292	79	48	834	251	258	797	18.308
105	UACH1208	10.7	50	44	2172	169	57	112	85	134	135	80	1959	292	79	48	834	251	258	797	18.308
106	UACH1213	10.7	50	44	2172	169	57	112	85	134	135	80	1959	292	79	48	834	251	258	797	18.308
107	UACH1214	10.7	50	44	2172	169	57	112	85	134	135	80	1959	292	79	48	834	251	258	797	18.308
108	UACH1215	10.7	50	44	2172	169	57	112	85	134	135	80	1959	292	79	48	834	251	258	797	18.308
109	UACH1215	10.7	50	44	2172	169	57	112	85	134	135	80	1959	292	79	48	834	251	258	797	18.308
110	UACH1217	10.7	50	44	2172	169	57	112	85	134	135	80	1959	292	79	48	834	251	258	797	18.308
111	UACH1219	10.7	50	44	2172	169	57	112	85	134	135	80	1959	292	79	48	834	251	258	797	18.308
112	UACH1222	10.7	50	44	2172	169	57	112	85	134	135	80	1959	292	79	48	834	251	258	797	18.308
113	UACH1225	10.7	50	44	2172	169	57	112	85	134	135	80	1959	292	79	48	834	251	258	797	18.308
114	UACH1227	10.7	50	44	2172	169	57	112	85	134	135	80	1959	292	79	48	834	251	258	797	18.308
115	UACH1228	10.7	50	44	2172	169	57	112	85	134	135	80	1959	292	79	48	834	251	258	797	18.308
116	UACH1235	10.7	52	46	2130	171	58	113	87	135	135	82	2365	340	91	48	1003	296	296	966	22.103
117	UACH1237	10.7	52	46	2130	171	58	113	87	135	135	82	2365	340	91	48	1003	296	296	966	22.103
118	UACH1238	10.7	52	46	2130	171	58	113	87	135	135	82	2365	340	91	48	1003	296	296	966	22.103
119	UACH1241	10.7	52	46	2130	171	58	113	87	135	135	82	2365	340	91	48	1003	296	296	966	22.103
120	UACH1242	10.7	52	46	2130	171	58	113	87	135	135	82	2365	340	91	48	1003	296	296	966	22.103
121	UACH1246	10.7	52	46	2130	171	58	113	87	135	135	82	2365	340	91	48	1003	296	296	966	22.103
122	UACH1247	10.7	52	46	2130	171	58	113	87	135	135	82	2365	340	91	48	1003	296	296	966	22.103
123	UACH1256	10.7	52	46	2130	171	58	113	87	135	135	82	2365	340	91	48	1003	296	296	966	22.103
124	UACH1257	10.7	52	46	2130	171	58	113	87	135	135	82	2365	340	91	48	1003	296	296	966	22.103
125	UACH1263	10.7	52	46	2130	171	58	113	87	135	135	82	2365	340	91	48	1003	296	296	966	22.103
126	UACH1273	9.4	56	45	2381	162	40	122	69	124	124	64	2204	300	103	39	852	327	327	839	23.447
127	UACH1275	9.4	56	45	2381	162	40	122	69	124	124	64	2204	300	103	39	852	327	327	839	23.447
128	UACH1276	9.4	56	45	2381	162	40	122	69	124	124	64	2204	300	103	39	852	327	327	839	23.447
129	UACH1286	9.4	56	45	2381	162	40	122	69	124	124	64	2204	300	103	39	852	327	327	839	23.447
130	UACH1287	9.4	56	45	2381	162	40	122	69	124	124	64	2204	300	103	39	852	327	327	839	23.447
131	UACH1288	9.4	56	45	2381	162	40	122	69	124	124	64	2204	300	103	39	852	327	327	839	23.447
132	UACH1289	9.4	56	45	2381	162	40	122	69	124	124	64	2204	300	103	39	852	327	327	839	23.447
133	UACH1294	9.4	56	45	2381	162	40	122	69	124	124	64	2204	300	103	39	852	327	327	839	23.447
134	UACH1295	9.4	56	45	2381	162	40	122	69	124	124	64	2204	300	103	39	852	327	327	839	23.447
135	UACH1331	9.4	56	45	2381	162	40	122	69	124	124	64	2204	300	103	39	852	327	327	839	23.447
136	UACH1333	9.4	56	45	2381	162	40	122	69	124	124	64	2204	300	103	39	852	327	327	839	23.447
137	UACH1334	9.4	56	45	2381	162	40	122	69	124	124	64	2204	300	103	39	852	327	327	839	23.447
138	UACH1335	9.4	56	45	2381	162	40	122	69	124	124	64	2204	300	103	39	852	327	327	839	23.447
139	UACH1336	9.4	56	45	2381	162	40	122	69	124	124	64	2204	300	103	39	852	327	327	839	23.447
140	UACH1337	9.4	56	45	2381	162	40	122	69	124	124	64	2204	300	103	39	852	327	327	839	23.447
141	UACH1346	9.4	56	45	2381	162	40	122	69	124	124	64	2204	300	103	39	852	327	327	839	23.447
142	UACH1369	10.7	109	54	3175	227	26	201	73	147	149	68	2113	385	48	66	1045	175	186	1001	19.748
143	UACH1384	10.5	77	50	2603	191	38	153	79	139	139	73	1621	236	62	41	640	226	226	613	15.438
144	UACH1402	11.4	102	53	3131	226	35	191	81	156	156	75	992	236	11	90	583	42	42	557	8.702
145	UACH1419	16	88	53	2676	246	80	166	131	194	195	127	125	39	0	119	90	0	0	90	0.781
146	UACH1421	16	88	53	2676	246	80	166	131	194	195	127	125	39	0	119	90	0	0	90	0.781
147	UACH192	11.7	97	51	3134	229	39	190	84	159	159	78	2220	353	60	60	1037	212	212	996	18.974
148	UACH195	11.7	97	51	3134	229	39	190	84	159	159	78	2220	353	60	60	1037	212	212	996	18.974
149	UACH1979	9.1	97	50	3377	202	10	192	56	135	135	49	2454	347	89	44	1003	329	329	962	26.967
150	UACH1986	9.1	97	50	3377	202	10	192	56	135	135	49	2454	347	89	44	1003	329	329	962	26.967
151	UACH1987	9.1	97	50	3377	202	10	192	56	135	135	49	2454	347	89	44	1003	329	329	962	26.967
152	UACH1989	9.1	97	50	3377	202	10	192	56	135	135	49	2454	347	89	44	1003	329	329	962	26.967
153	UACH2009	9.1	97	50	3377	202	10	192	56	135	135	49	2454	347	89	44	1003	329	329	962	26.967
154	UACH208	11.7	97	51	3134	229	39	190	84	159	159	78	2220	353	60	60	1037	212	212	996	18.974
155	UACH211	11	109	53	3206	230	27	203	76	150	152	70	2103	388	48	67	1050	172	185	998	19.118
156	UACH2119	6.4	68	43	3148	154	-2	156	63	65	104	23	425	46	25	16	132	87	101	105	6.641
157	UACH212	11	109	53	3206	230	27	203	76	150	152	70	2103	388	48	67	1050	172	185	998	19.118
158	UACH2120	6.4	68	43	3148	154	-2	156	63	65	104	23	425	46	25	16	132	87	101	105	6.641
159	UACH2124	6.4	68	43	3148	154	-2	156	63	65	104	23	425	46	25	16	132	87	101	105	6.641
160	UACH2127	6.4	68	43	3148	154	-2	156	63	65	104	23	425	46	25	16	132	87	101	105	6.641
161	UACH213	11	109	53	3206	230	27	203	76	150	152	70	2103	388	48	67	1050	172	185	998	19.118
162	UACH214	11	109	53	3206	230	27	203	76	150	152	70	2103	388	48	67	1050	172	185	998	19.118
163	UACH215	11	109	53	3206	230	27	203	76	150	152	70	2103	388	48	67	1050	172	185	998	19.118
164	UACH215	11	109	53	3206	230	27	203	76	150	152	70	2103	388	48	67	1050	172	185	998	19.118
165	UACH216	11	109	53	3206	230	27	203	76	150	152	70	2103	388	48	67	1050	172	185	998	19.118
166	UACH220	11	109	53	3206	230	27	203	76	150	152	70	2103	388	48	67	1050	172	185	998	19.118
167	UACH221	11	109	53	3206	230	27	203	76	150	152	70	2103	388	48	67	1050	172	185	998	19.118
168	UACH222	11	109	53	3206	230	27	203	76	150	152	70	2103	388	48	67	1050	172	185	998	19.118
169	UACH223	10.7	109	54	3175	227	26	201	73	147	149	68	2113	385	48	66	1045	175	186	1001	19.748
170	UACH229	11.7	93	51	2903	222	43	179	87	156	156	81	2245	342	64	56	1010	224	224	970	19.188
171	UACH231	12	101	52	3140	234	40	194	87	159	162	81	1818	298	43	61	859	165	169	824	15.15
172	UACH232	11.7	97	51	3134	229	39	190	84	159	159	78	2220	353	60	60	1037	212	212	996	18.974
173	UACH233	12	101	52	3140	234	40	194	87	159	162	81	1818	298	43	61	859	165	169	824	15.15
174	UACH234	9.1	97	50	3377	202	10	192	56	135	135	49	2454	347	89	44	1003	329	329	962	26.967
175	UACH236	9.1	97	50	3377	202	10	192	56	135	135	49	2454	347	89	44	1003	329	329	962	26.967
176	UACH237	9.1	97	50	3377	202	10	192	56	135	135	49	2454	347	89	44	1003	329	329	962	26.967
177	UACH238	9.1	97	50	3377	202	10	192	56	135	135	49	2454	347	89	44	1003	329	329	962	26.967
178	UACH239	9.1	97	50	3377	202	10	192	56	135	135	49	2454	347	89	44	1003	329	329	962	26.967
179	UACH2392	13.3	109	51	3664	258	45	213	94	183	183	88	978	234	10	90	578	43	43	552	7.353
180	UACH2395	13.3	109	51	3664	258	45	213	94	183	183	88	978	234	10	90	578	43	43	552	7.353
181	UACH246	9.1	97	50	3377	202	10	192	56	135	135	49	2454	347	89	44	1003	329	329	962	26.967
182	UACH2690	11.4	102	53	3131	226	35	191	81	156	156	75	992	236	11	90	583	42	42	557	8.702
183	UACH2692	11.4	102	53	3131	226	35	191	81	156	156	75	992	236	11	90	583	42	42	557	8.702
184	UACH3614	11.9	156	58	4010	269	4	265	76	172	172	68	548	121	2	96	334	12	12	323	4.605
185	UACH3754	13.2	139	51	4568	291	22	269	79	193	193	75	853	215	7	96	531	24	24	501	6.462
186	UACH3755	13.2	139	51	4568	291	22	269	79	193	193	75	853	215	7	96	531	24	24	501	6.462
187	UACH3769	12.2	110	51	3661	248	33	215	83	172	172	76	1013	239	11	89	595	44	44	565	8.303
188	UACH4420	11.4	102	53	3131	226	35	191	81	156	156	75	992	236	11	90	583	42	42	557	8.702
189	UACH4423	11.4	102	53	3131	226	35	191	81	156	156	75	992	236	11	90	583	42	42	557	8.702
190	UACH5001	14.3	117	50	4134	280	46	234	98	198	198	92	786	185	7	91	470	27	27	444	5.497
191	UACH5002	14.3	117	50	4134	280	46	234	98	198	198	92	786	185	7	91	470	27	27	444	5.497
192	UACH5005	14.3	117	50	4134	280	46	234	98	198	198	92	786	185	7	91	470	27	27	444	5.497
193	UACH5007	14.3	117	50	4134	280	46	234	98	198	198	92	786	185	7	91	470	27	27	444	5.497
194	UACH5008	14.3	117	50	4134	280	46	234	98	198	198	92	786	185	7	91	470	27	27	444	5.497
195	UACH5010	14.3	117	50	4134	280	46	234	98	198	198	92	786	185	7	91	470	27	27	444	5.497
196	UACH5012	14.3	117	50	4134	280	46	234	98	198	198	92	786	185	7	91	470	27	27	444	5.497
197	UACH5013	14.3	117	50	4134	280	46	234	98	198	198	92	786	185	7	91	470	27	27	444	5.497
198	UACH5033	14.7	128	52	4179	291	46	245	100	196	202	94	775	197	5	100	498	19	19	463	5.272
199	UACH5034	14.7	128	52	4179	291	46	245	100	196	202	94	775	197	5	100	498	19	19	463	5.272
200	UACH5364	11	142	60	3441	242	9	233	67	155	155	67	469	121	1	104	304	6	6	304	4.264
201	UACH5365	11	142	60	3441	242	9	233	67	155	155	67	469	121	1	104	304	6	6	304	4.264
202	UACH5366	11	142	60	3441	242	9	233	67	155	155	67	469	121	1	104	304	6	6	304	4.264
203	UACH5367	11	142	60	3441	242	9	233	67	155	155	67	469	121	1	104	304	6	6	304	4.264
204	UACH5368	11	142	60	3441	242	9	233	67	155	155	67	469	121	1	104	304	6	6	304	4.264
205	UACH5369	11	142	60	3441	242	9	233	67	155	155	67	469	121	1	104	304	6	6	304	4.264
206	UACH5370	11	142	60	3441	242	9	233	67	155	155	67	469	121	1	104	304	6	6	304	4.264
207	UACH5371	11	142	60	3441	242	9	233	67	155	155	67	469	121	1	104	304	6	6	304	4.264
208	UACH5372	11	142	60	3441	242	9	233	67	155	155	67	469	121	1	104	304	6	6	304	4.264
209	UACH5375	14.7	128	52	4179	291	46	245	100	196	202	94	775	197	5	100	498	19	19	463	5.272
210	UACH5376	14.7	128	52	4179	291	46	245	100	196	202	94	775	197	5	100	498	19	19	463	5.272
211	UACH5380	14.7	128	52	4179	291	46	245	100	196	202	94	775	197	5	100	498	19	19	463	5.272
212	UACH5383	14.7	128	52	4179	291	46	245	100	196	202	94	775	197	5	100	498	19	19	463	5.272
213	UACH5385	14.7	128	52	4179	291	46	245	100	196	202	94	775	197	5	100	498	19	19	463	5.272
214	UACH5387	14.7	128	52	4179	291	46	245	100	196	202	94	775	197	5	100	498	19	19	463	5.272
215	UACH5601	11	142	60	3441	242	9	233	67	155	155	67	469	121	1	104	304	6	6	304	4.264
216	UACH72	15.3	116	61	2721	256	66	190	123	186	189	118	361	97	0	110	246	2	2	236	2.359
217	UACH73	15.3	116	61	2721	256	66	190	123	186	189	118	361	97	0	110	246	2	2	236	2.359
218	UACH74	15.3	116	61	2721	256	66	190	123	186	189	118	361	97	0	110	246	2	2	236	2.359
219	UACH74	15.3	116	61	2721	256	66	190	123	186	189	118	361	97	0	110	246	2	2	236	2.359
220	UACH75	15.3	116	61	2721	256	66	190	123	186	189	118	361	97	0	110	246	2	2	236	2.359
221	UACH76	15.3	116	61	2721	256	66	190	123	186	189	118	361	97	0	110	246	2	2	236	2.359
222	UACH77	15.3	116	61	2721	256	66	190	123	186	189	118	361	97	0	110	246	2	2	236	2.359
223	UACH77	15.3	116	61	2721	256	66	190	123	186	189	118	361	97	0	110	246	2	2	236	2.359
224	UACH78	15.3	116	61	2721	256	66	190	123	186	189	118	361	97	0	110	246	2	2	236	2.359
225	UACH79	15.3	116	61	2721	256	66	190	123	186	189	118	361	97	0	110	246	2	2	236	2.359
226	UACH80	15.3	116	61	2721	256	66	190	123	186	189	118	361	97	0	110	246	2	2	236	2.359
227	UACH81	15.3	116	61	2721	256	66	190	123	186	189	118	361	97	0	110	246	2	2	236	2.359
228	UACH81	15.3	116	61	2721	256	66	190	123	186	189	118	361	97	0	110	246	2	2	236	2.359
229	UACH82	15.3	116	61	2721	256	66	190	123	186	189	118	361	97	0	110	246	2	2	236	2.359
230	UACH83	15.3	116	61	2721	256	66	190	123	186	189	118	361	97	0	110	246	2	2	236	2.359
231	UACH84	15.3	116	61	2721	256	66	190	123	186	189	118	361	97	0	110	246	2	2	236	2.359
232	UACH87	16	111	50	3929	289	68	221	116	207	212	111	604	127	1	93	365	16	16	345	3.775
233	UACH88	16	111	50	3929	289	68	221	116	207	212	111	604	127	1	93	365	16	16	345	3.775
234	UACH998	11.4	102	53	3131	226	35	191	81	156	156	75	992	236	11	90	583	42	42	557	8.702
235	UACH999	11.4	102	53	3131	226	35	191	81	156	156	75	992	236	11	90	583	42	42	557	8.702
